# Supplementary material for: Paclitaxel as HIPEC-Drug after Surgical Cytoreduction for Ovarian Peritoneal Metastases: A Randomized Phase III Clinical Trial (HIPECOVA)
Source: MDPI journal article supplement (doi:10.3390/curroncol31020048), 2024-01-24
Supplement: s1 [file s1]

## Supplementary Materials

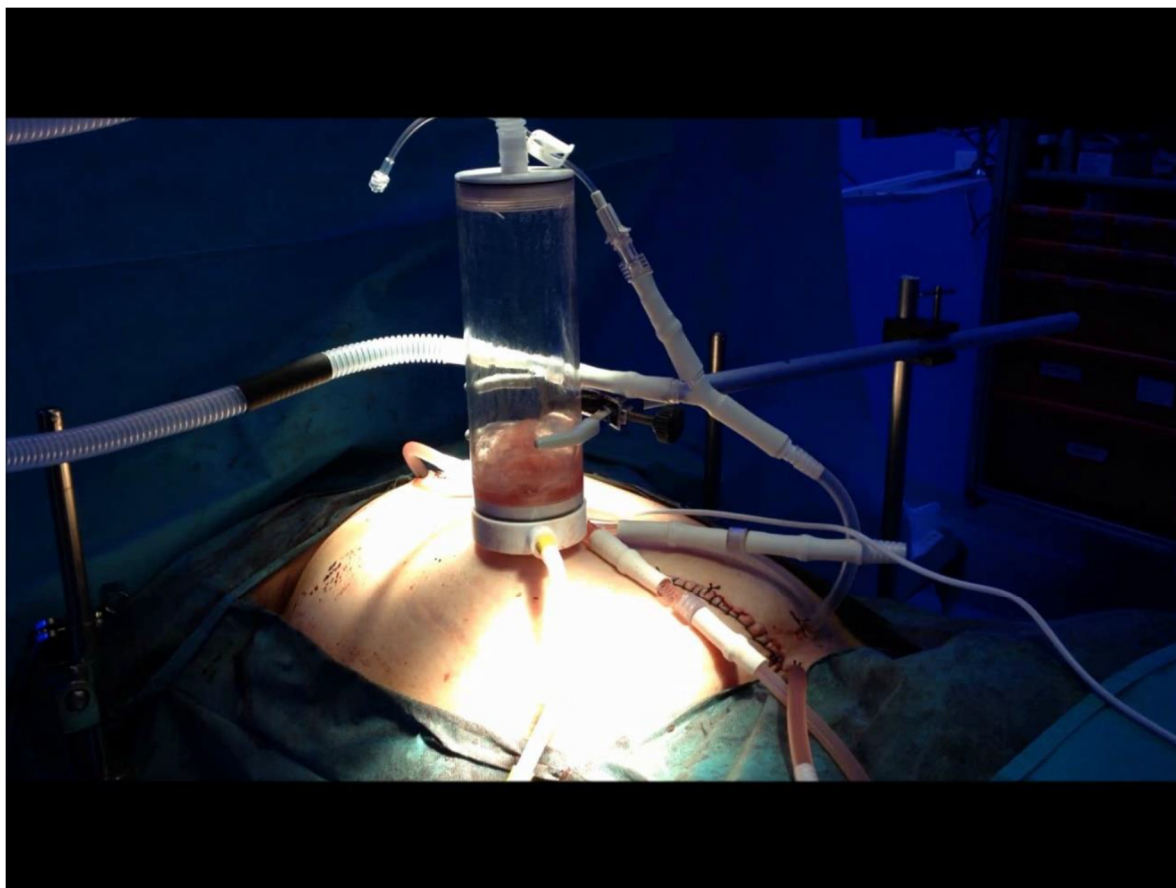

**Figure S1.** Closed abdomen and CO<sub>2</sub> recirculation system.

**Table S1.** Peritoneal Surface Disease Severity Score (PSDSS).

| Clinical symptoms                                                                                                                                                                                                                                         | Peritoneal cancer index (PCI) | Tumor histopathology                                 |
|-----------------------------------------------------------------------------------------------------------------------------------------------------------------------------------------------------------------------------------------------------------|-------------------------------|------------------------------------------------------|
| No symptoms = 0 point                                                                                                                                                                                                                                     | PCI < 10 = 1 point            | Well or moderately differentiated and N0 = 1 point   |
| Mild symptoms = 1 point                                                                                                                                                                                                                                   | PCI 10-20 = 3 point           | Moderately differentiated and N1/N2 = 3 points       |
| Severe symptoms = 6 points                                                                                                                                                                                                                                | PCI > 20 = 7 point            | Poorly differentiated or signet ring cell = 9 points |
| <ul style="list-style-type: none"> <li><b>Mild symptoms:</b> weight loss &lt; 10%, mild abdominal pain, asymptomatic ascites.</li> <li><b>Severe symptoms:</b> weight loss ≥ 10%, bowel obstruction, uncontrollable pain, symptomatic ascites.</li> </ul> |                               |                                                      |
| PSDSS Classification                                                                                                                                                                                                                                      |                               | PDSS value                                           |
| 1                                                                                                                                                                                                                                                         |                               | 2-3 points                                           |
| 2                                                                                                                                                                                                                                                         |                               | 4-7 points                                           |
| 3                                                                                                                                                                                                                                                         |                               | 8-10 points                                          |
| 4                                                                                                                                                                                                                                                         |                               | >10 points                                           |

**Table S2.** Results of the survival analysis of the main variables related to surgery outcomes.

| Variable                            | OS (median) | Log Rank test | RFS (median) | Log Rank test |
|-------------------------------------|-------------|---------------|--------------|---------------|
| HIPEC                               | 46          | $p = 0.579$   | 23           | $p = 0.220$   |
| No HIPEC                            | 48          |               | 19           |               |
| Positive lymph nodes                | 46          | $p = 0.601$   | 13           | $p = 0.121$   |
| Negative lymph nodes                | 51          |               | 24           |               |
| Primary cytoreduction               | 46          | $p = 0.246$   | 29           | $p = 0.234$   |
| Interval cytoreduction              | 36          | $p = 0.584$   | 19           | $p = 0.197$   |
| Secondary cytoreduction             | 51          | $p = 0.506$   | 8            | $p = 0.78$    |
| CCR-0 (PCI ≤ 20)                    | 51          | $p = 0.065$   | 23           | $p = 0.198$   |
| CCR-1 (PCI > 20)                    | 35          |               | 11           |               |
| Intraoperative blood transfusion    | 36          | $p = 0.178$   | 13           | $p = 0.47$    |
| No intraoperative blood transfusion | 65          |               | 30           |               |
| Histologic Grade I/II               | 46          | $p = 0.540$   | 29           | $p = 0.199$   |
| Histologic Grade III                | 35          | $p = 0.201$   | 19           |               |

OS: Overall survival, RFS: Recurrence free survival, CCR: Complete Cytoreduction Reduction score, PCI: Peritoneal Cancer Index.

**Table S3.** Complications according to the Clavien–Dindo Classification.

|          | NO adverse events | I          | II        | IIIa     | IIIb     | V        | TOTAL PATIENTS |
|----------|-------------------|------------|-----------|----------|----------|----------|----------------|
| HIPEC    | 16 (29.1%)        | 5 (9.1%)   | 3 (5.5%)  | 3 (5.5%) | 3 (5.5%) | 2 (3.6%) | 32             |
| NO HIPEC | 6 (10.9%)         | 8 (14.5%)  | 6 (10.9%) | 1 (1.8%) | 1 (1.8%) | 1 (1.8%) | 23             |
| TOTAL    | 22 (40%)          | 13 (23.6%) | 9 (16.4%) | 4 (7.3%) | 4 (7.3%) | 3 (5.5%) | 55             |

No significant differences between the two groups were noted in adverse event of any grade ( $p = 0.482$ ).
